# Supplementary material for: A novel H2S releasing-monastrol hybrid (MADTOH) inhibits L-type calcium channels
Source: Royal Society of Chemistry journal article supplement (doi:10.1039/d0nj04415f), 2020-12-09
Supplement: d0nj04415f1.pdf [file d0nj04415f1.pdf]

## SUPPORTING INFORMATION

### *A novel H<sub>2</sub>S releasing-monastrol hybrid (MADTOH) inhibits L-type calcium channels*

Taniris Cafiero Braga,<sup>a</sup> Itamar Couto Guedes de Jesus,<sup>b</sup> Kathleen Viveiros Soares,<sup>a</sup> Silvia Guatimosim,<sup>b</sup> Leonardo da Silva Neto,<sup>c</sup> Cristiane Jovelina da-Silva,<sup>d</sup> Luzia Valentina Modolo,<sup>d</sup> José Evaldo Rodrigues Menezes Filho,<sup>e</sup> Paula Rhana,<sup>f</sup> Jader Santos Cruz,<sup>f</sup> Ângelo de Fátima<sup>a,\*</sup>

<sup>a</sup>Departamento de Química, Universidade Federal de Minas Gerais, Belo Horizonte, MG, 31270-901, Brazil.

<sup>b</sup>Departamento de Fisiologia e Biofísica, Instituto de Ciências Biológicas, Universidade Federal de Minas Gerais, Belo Horizonte, MG, 31270-901, Brazil.

<sup>c</sup>Instituto Federal Farroupilha, Alegrete, RS, 97555-000, Brazil.

<sup>d</sup>Departamento de Botânica, Instituto de Ciências Biológicas, Universidade Federal de Minas Gerais, Belo Horizonte, MG, 31270-901, Brazil.

<sup>e</sup>Faculdades Integradas de Sergipe, Tobias Barreto, SE, 49300-000, Brazil.

<sup>f</sup>Departamento de Bioquímica e imunologia, Instituto de Ciências Biológicas, Universidade Federal de Minas Gerais, Belo Horizonte, MG, 31270-901, Brazil

\*Corresponding author: Prof. Dr. Ângelo de Fátima: Tel.: +55-31-3409-6373 / E-mail: adefatima@qui.ufmg.br

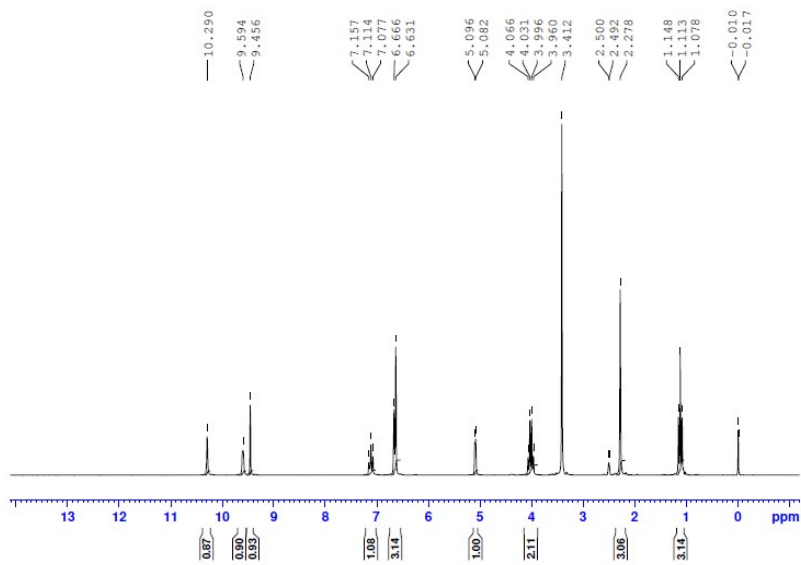

**Figure S1.**  $^1\text{H}$  spectrum of monastrol (**M**) (200 MHz,  $\text{DMSO-}d_6$ ).

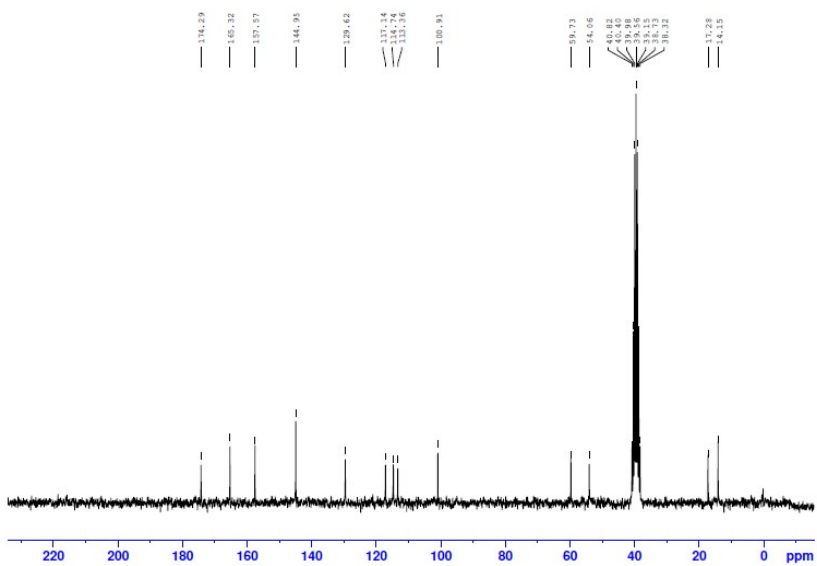

**Figure S2.**  $^{13}\text{C}$  spectrum of monastrol (**M**) (50 MHz,  $\text{DMSO-}d_6$ ).

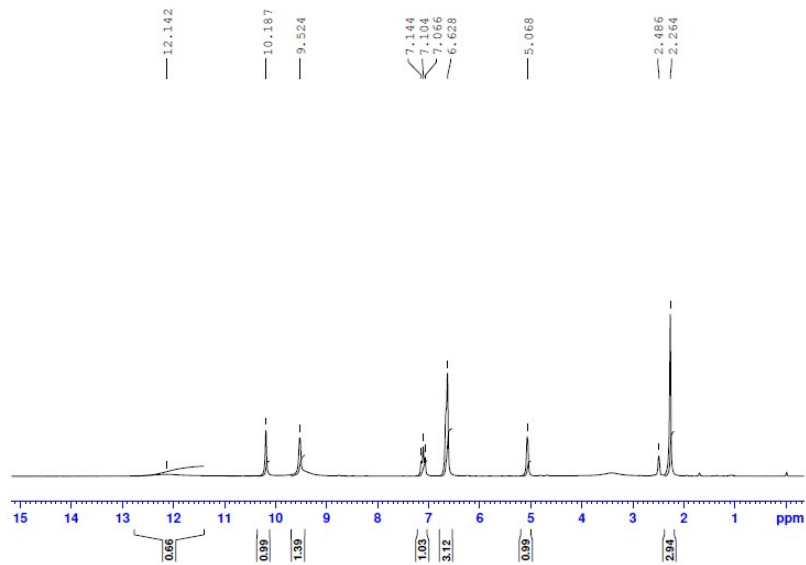

**Figure S3.**  $^1\text{H}$  spectrum of 4-(3-hydroxyphenyl)-6-methyl-2-thioxo-1,2,3,4-tetrahydropyrimidine-5-carboxylic acid (**4**) (200 MHz,  $\text{DMSO-}d_6$ ).

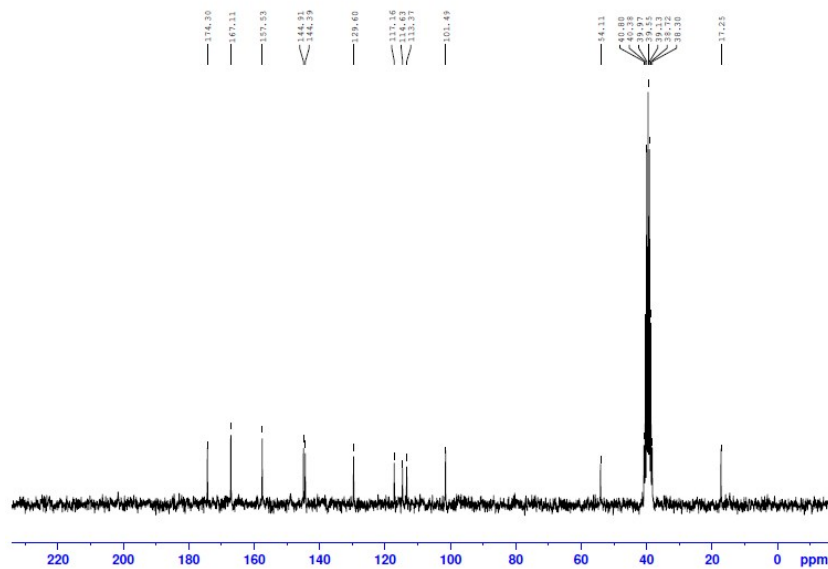

**Figure S4.**  $^{13}\text{C}$  spectrum of 4-(3-hydroxyphenyl)-6-methyl-2-thioxo-1,2,3,4-tetrahydropyrimidine-5-carboxylic acid (**4**) (50 MHz,  $\text{DMSO-}d_6$ ).

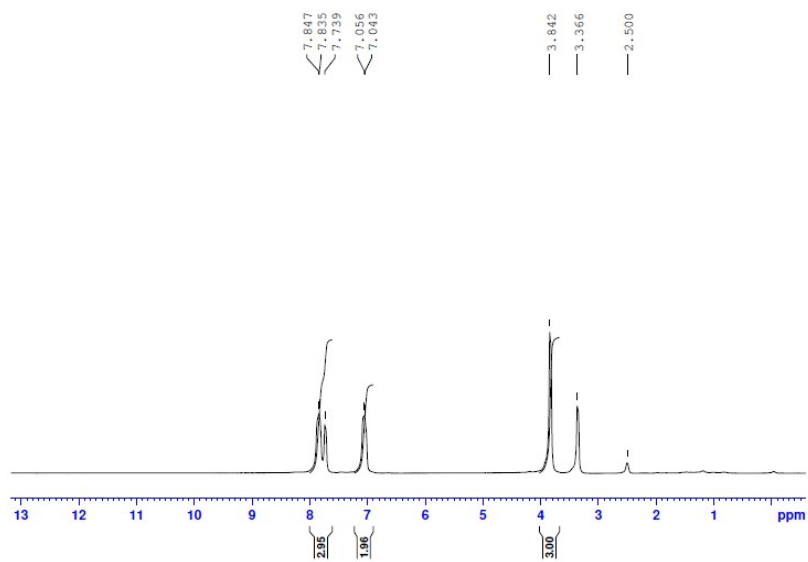

**Figure S5.**  $^1\text{H}$  spectrum of 5-(4-methoxyphenyl)-3*H*-1,2-dithiole-3-thione (**9**) (200 MHz,  $\text{DMSO-}d_6$ ).

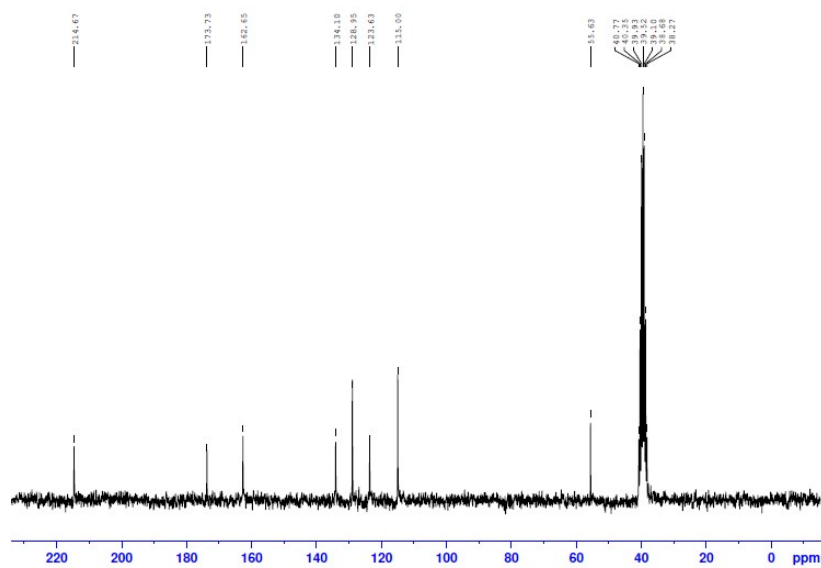

**Figure S6.**  $^{13}\text{C}$  spectrum of 5-(4-methoxyphenyl)-3*H*-1,2-dithiole-3-thione (**9**) (50 MHz,  $\text{DMSO-}d_6$ ).

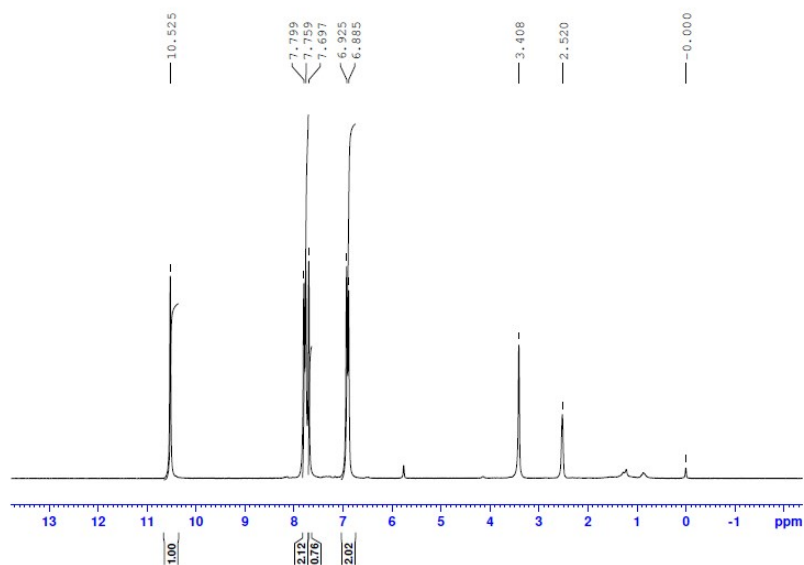

**Figure S7.**  $^1\text{H}$  spectrum of 5-(4-hydroxyphenyl)-3*H*-1,2-dithiole-3-thione (**ADTOH**) (200 MHz,  $\text{DMSO-}d_6$ ).

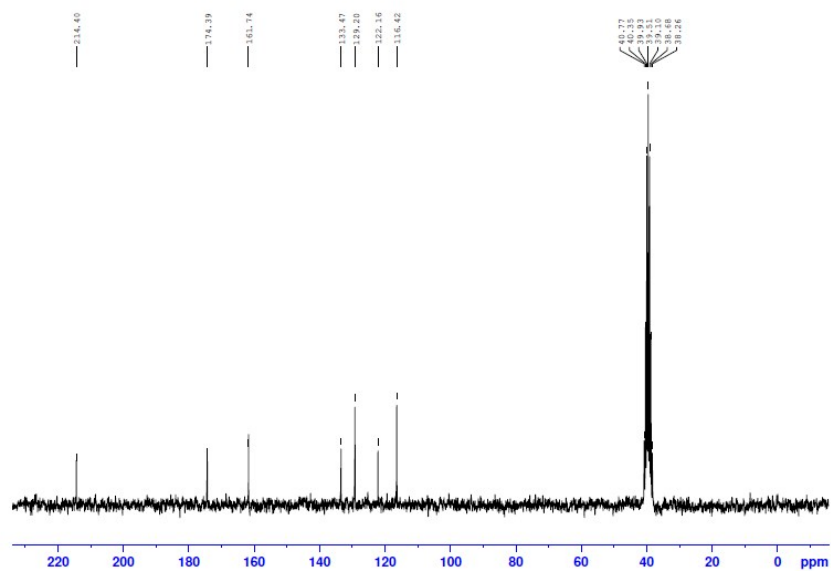

**Figure S8.**  $^{13}\text{C}$  spectrum of 5-(4-hydroxyphenyl)-3*H*-1,2-dithiole-3-thione (**ADTOH**) (50 MHz,  $\text{DMSO-}d_6$ ).

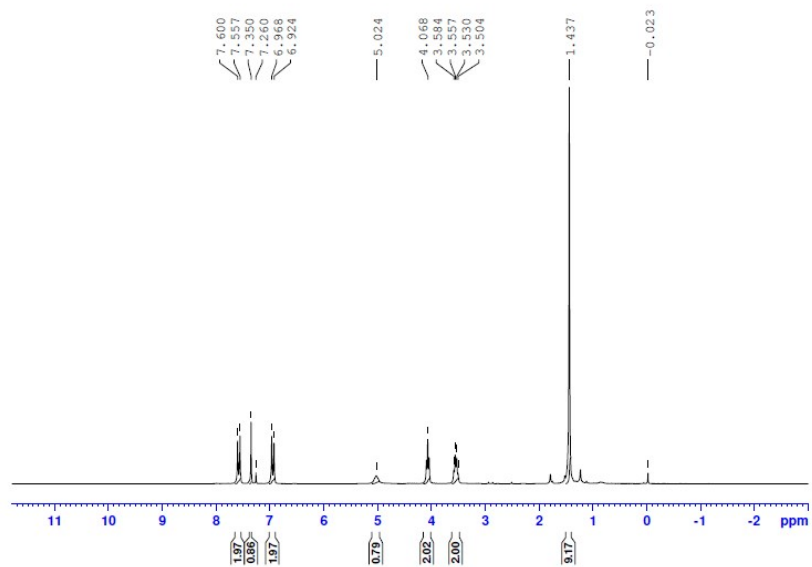

**Figure S9.** <sup>1</sup>H spectrum of *tert*-butyl(2-(4-(3-thioxo-3H-1,2-dithiol-5-yl)phenoxy)ethyl)carbamate (**10**) (200 MHz, CDCl<sub>3</sub>).

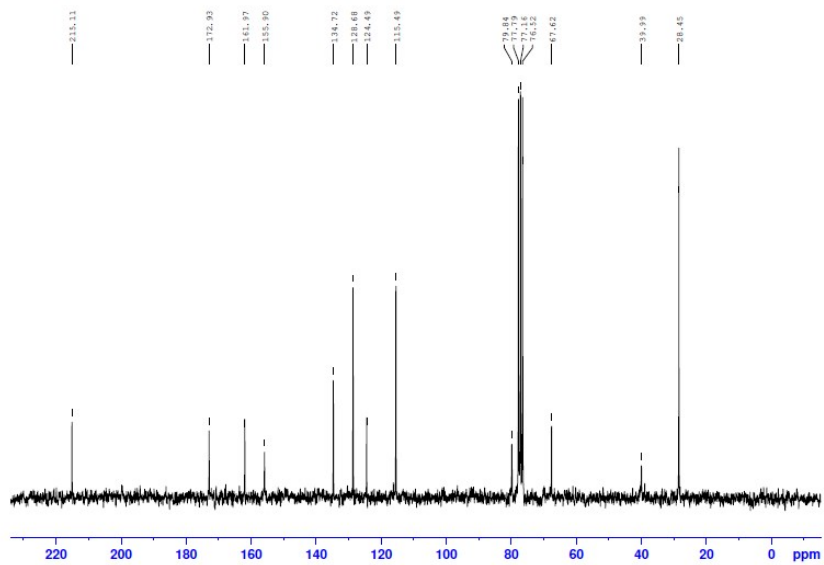

**Figure S10.** <sup>13</sup>C spectrum of *tert*-butyl(2-(4-(3-thioxo-3H-1,2-dithiol-5-yl)phenoxy)ethyl)carbamate (**10**) (50 MHz, CDCl<sub>3</sub>).

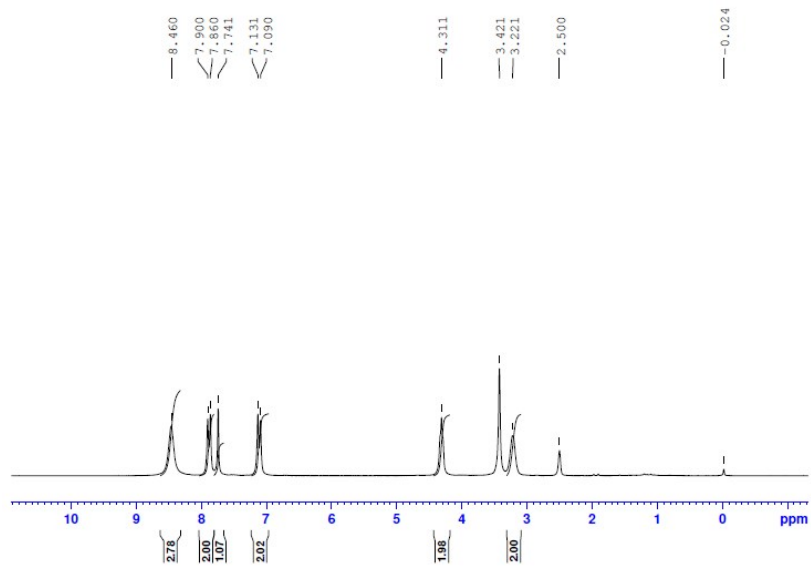

**Figure S11.**  $^1\text{H}$  spectrum of 5-(4-(2-aminoethoxy)phenyl)-3H-1,2-dithiole-3-thione hydrochloride (**11**) (200 MHz,  $\text{DMSO-}d_6$ ).

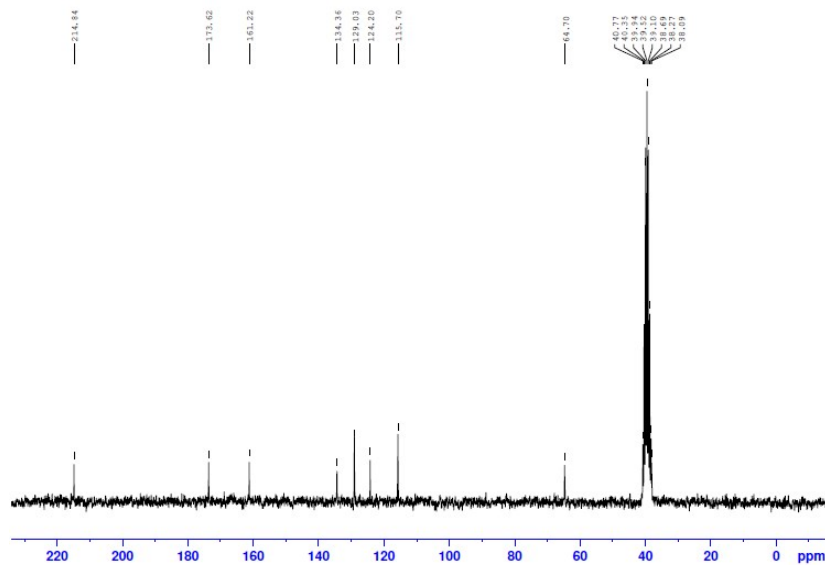

**Figure S12.**  $^{13}\text{C}$  spectrum of 5-(4-(2-aminoethoxy)phenyl)-3H-1,2-dithiole-3-thione hydrochloride (**11**) (50 MHz,  $\text{DMSO-}d_6$ ).

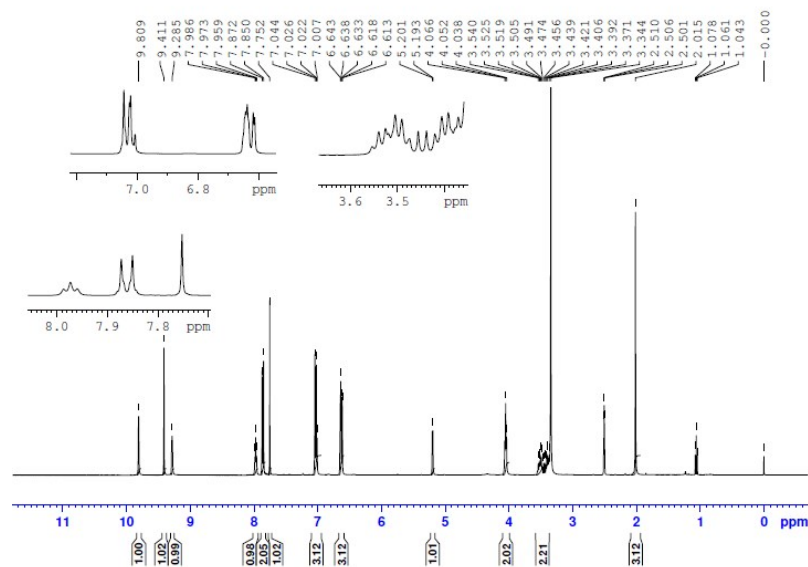

**Figure S13.**  $^1\text{H}$  spectrum of 4-(3-hydroxyphenyl)-6-methyl-2-thioxo-*N*-(2-(4-(3-thioxo-3*H*-1,2-dithiol-5-yl)phenoxy)ethyl)-1,2,3,4-tetrahydropyrimidine-5-carboxamide (**MADTOH**) (200 MHz,  $\text{DMSO-}d_6$ ).

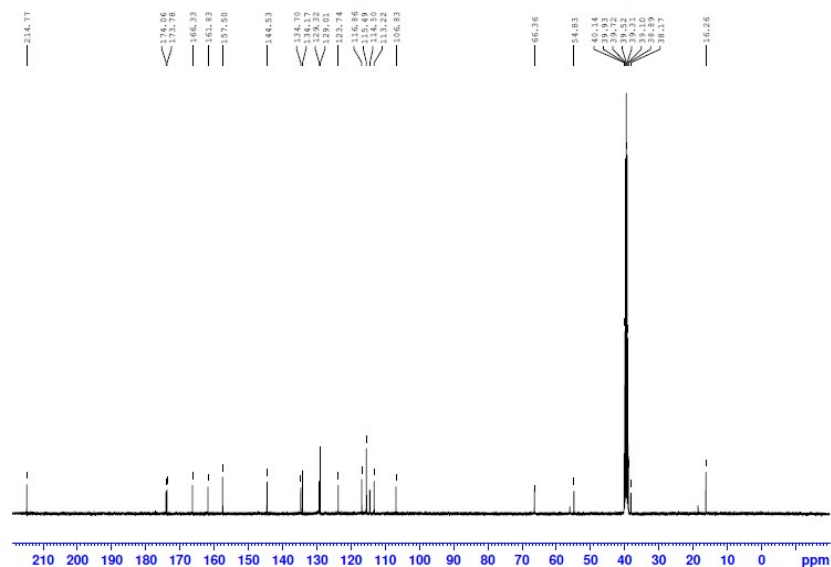

**Figure S14.**  $^{13}\text{C}$  spectrum of 4-(3-hydroxyphenyl)-6-methyl-2-thioxo-*N*-(2-(4-(3-thioxo-3*H*-1,2-dithiol-5-yl)phenoxy)ethyl)-1,2,3,4-tetrahydropyrimidine-5-carboxamide (**MADTOH**) (50 MHz,  $\text{DMSO-}d_6$ ).
